# Supplementary material for: An Introduction to Biomolecular Graphics
Source: PLOS journal article supplement (doi:10.1371/journal.pcbi.1000918), 2010-08-26

**Figure S2. Different representation styles and their relative utility.**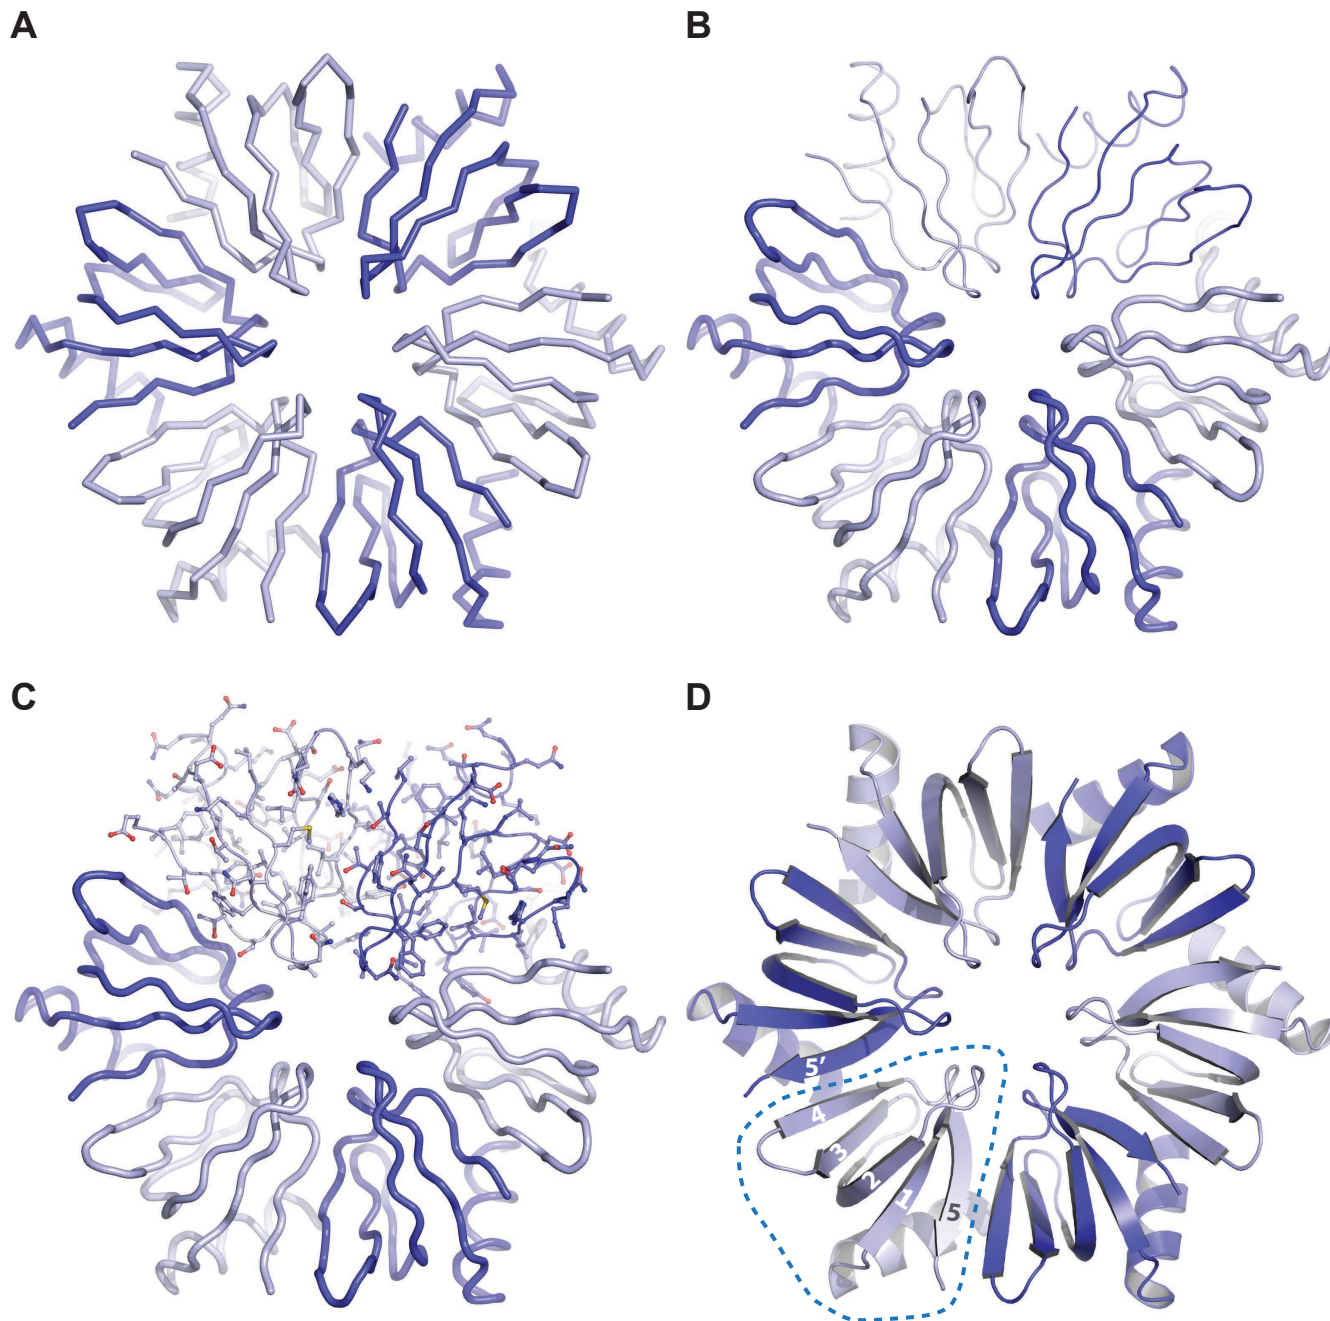

**Figure S2. Different representation styles and their relative utility. (cont'd)**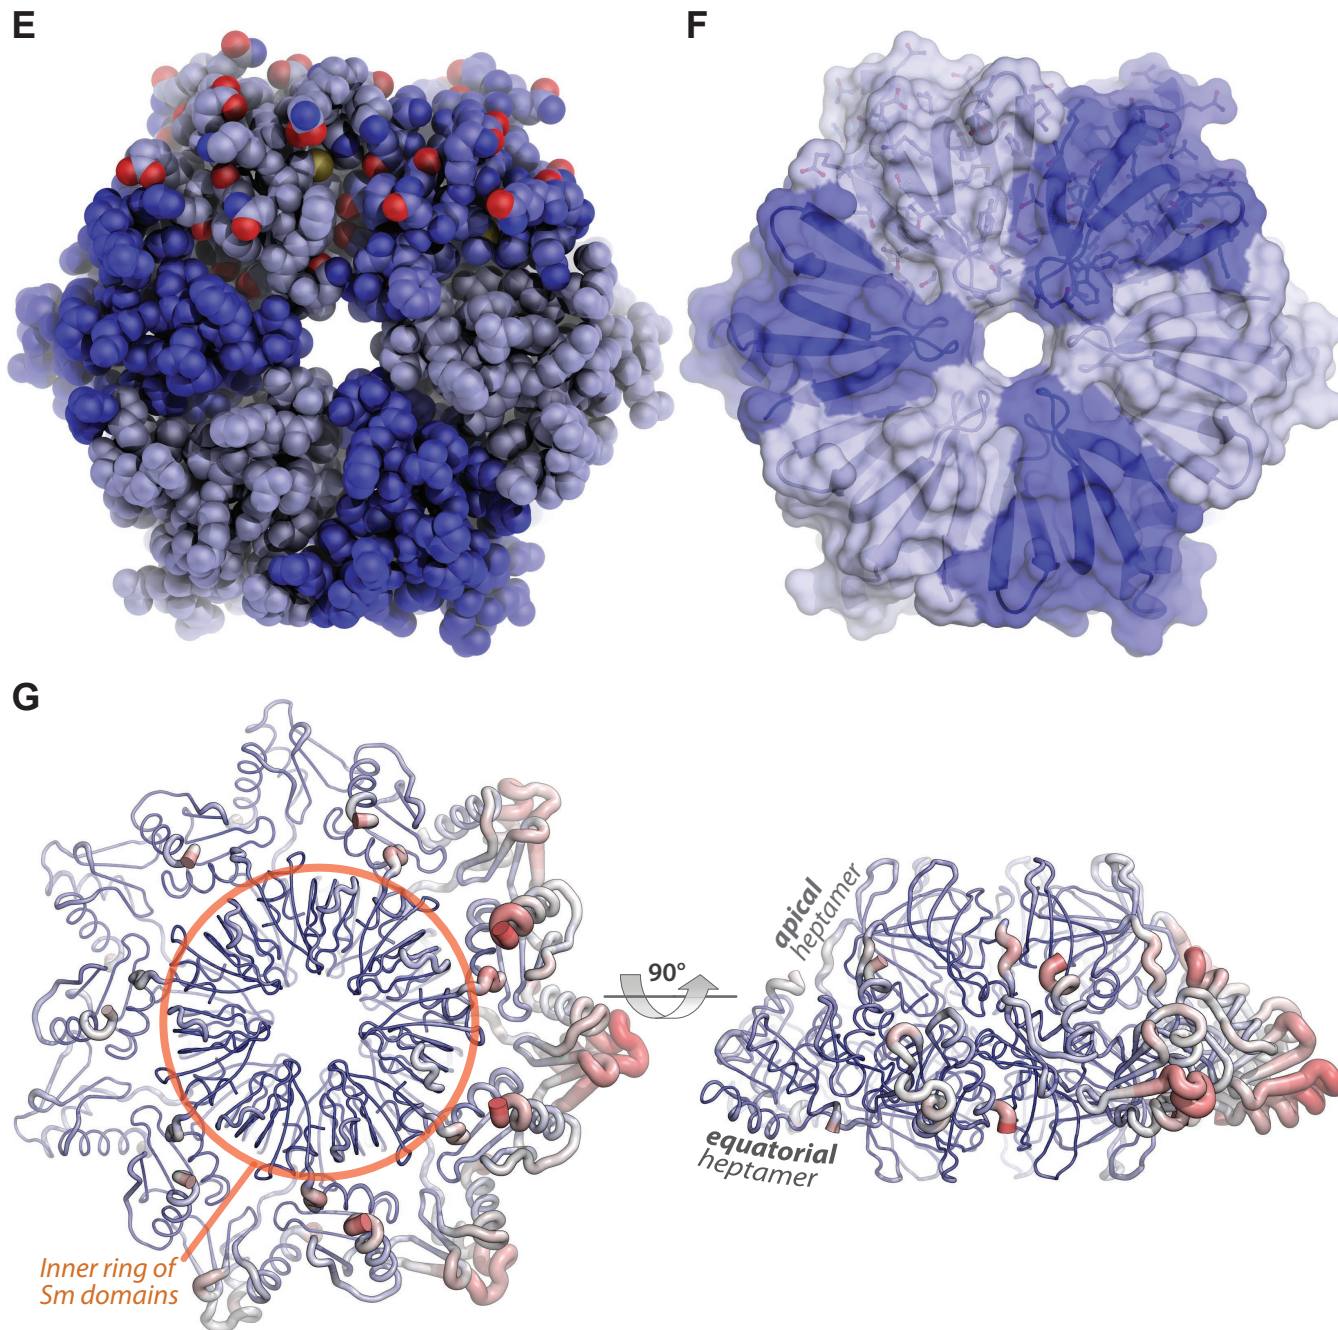

Supplement: S3 (10.1371/journal.pcbi.1000918.s003) [file journal.pcbi.1000918.s003]
