# Supplementary material for: An Introduction to Biomolecular Graphics
Source: PLOS journal article supplement (doi:10.1371/journal.pcbi.1000918), 2010-08-26

**Figure S3. A tetradecamer assembly: Overall architecture, bipartite domain organization, and  $\text{Cd}^{2+}$ -binding sites.**

**A**

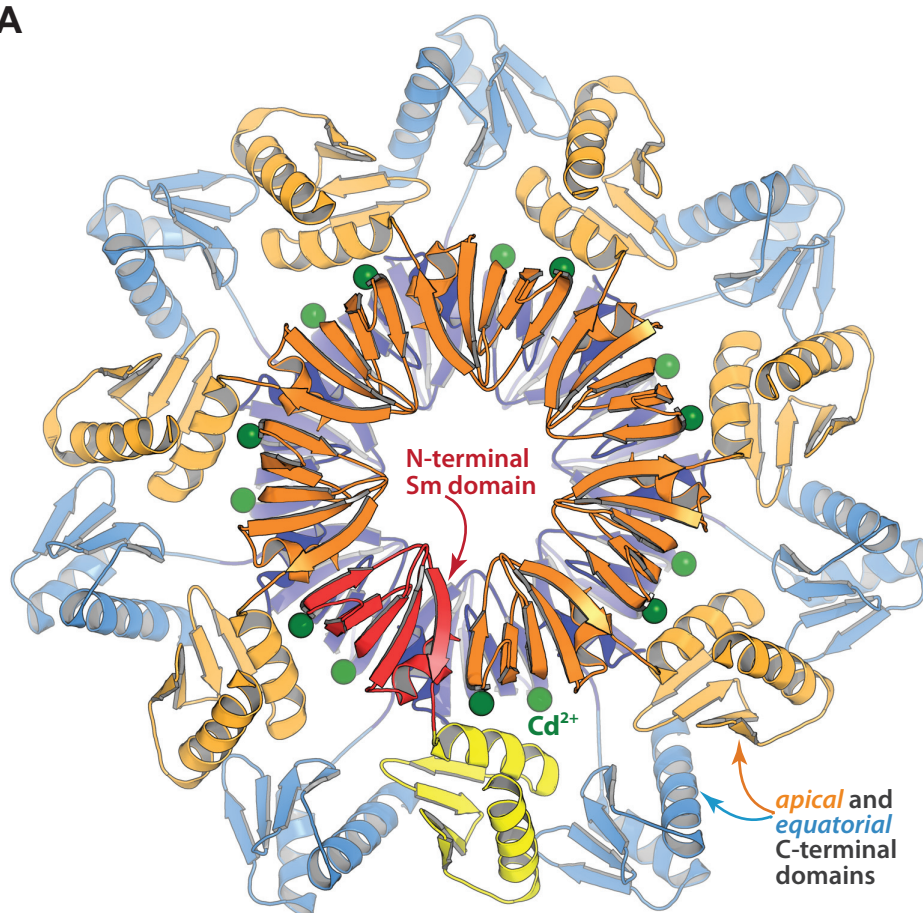

**B**

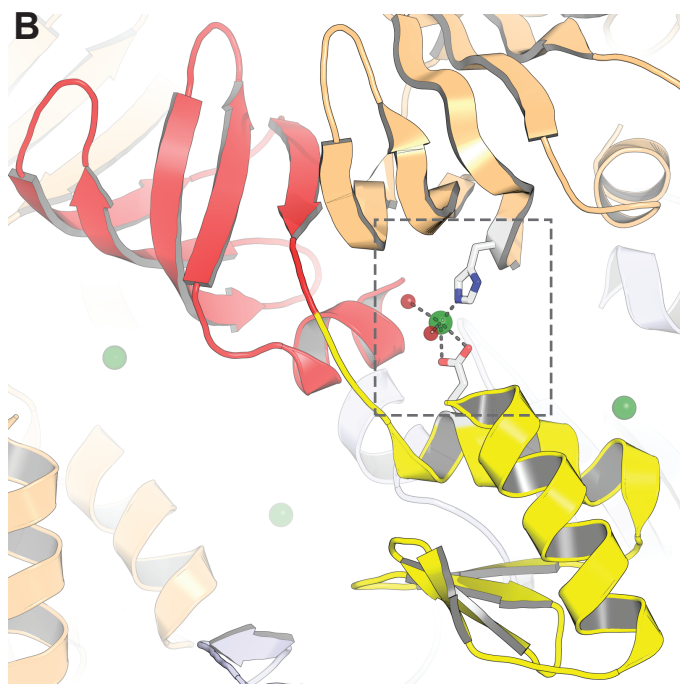

**C**

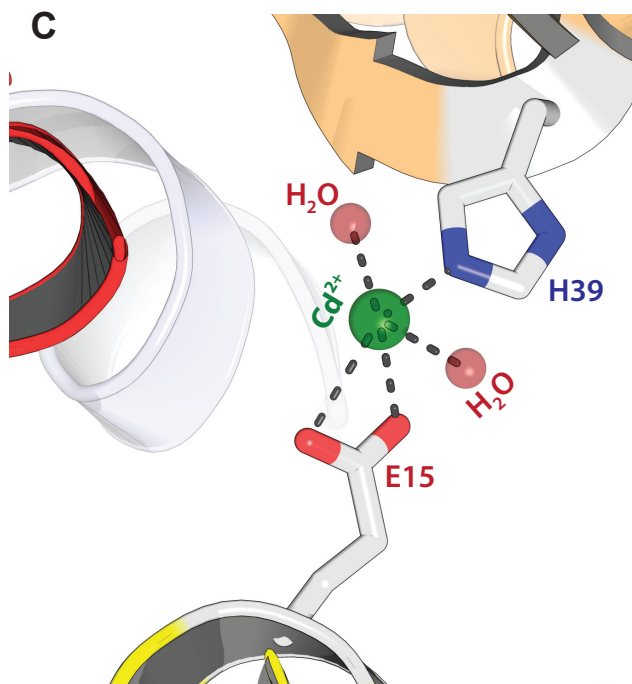

Supplement: S4 (10.1371/journal.pcbi.1000918.s004) [file journal.pcbi.1000918.s004]
