# Supplementary material for: An Introduction to Biomolecular Graphics
Source: PLOS journal article supplement (doi:10.1371/journal.pcbi.1000918), 2010-08-26

**Figure S4. Representations of volumetric data: Electron density and electrostatic potentials.**

**A**

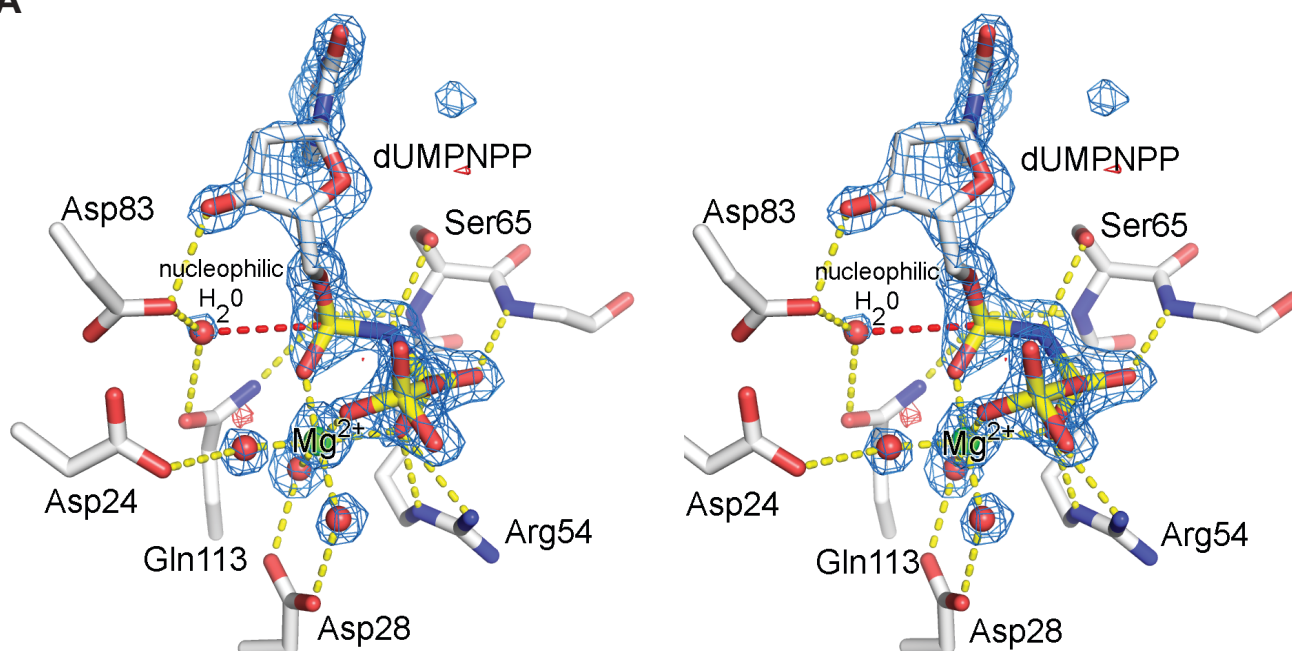

**B**

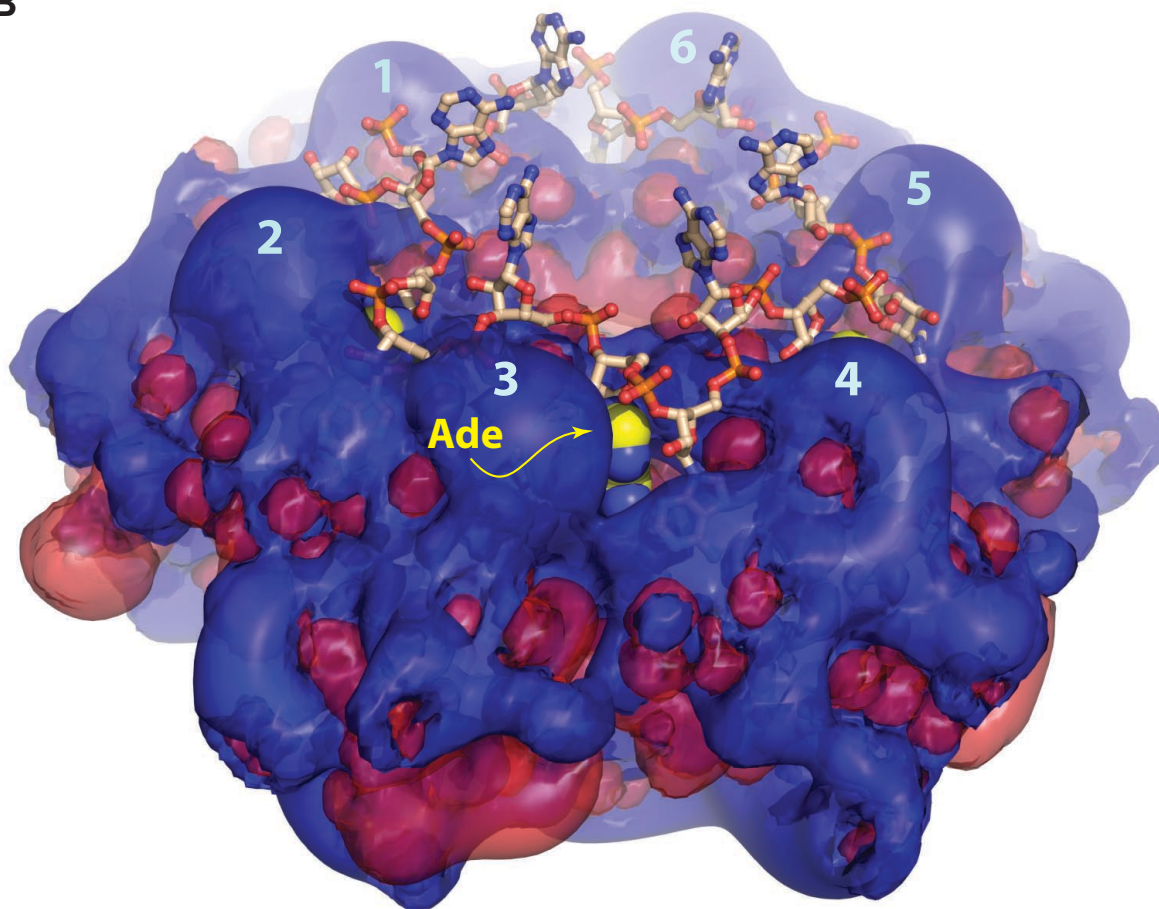

**Figure S4. Representations of volumetric data: Electron density and electrostatic potentials.**

**C**

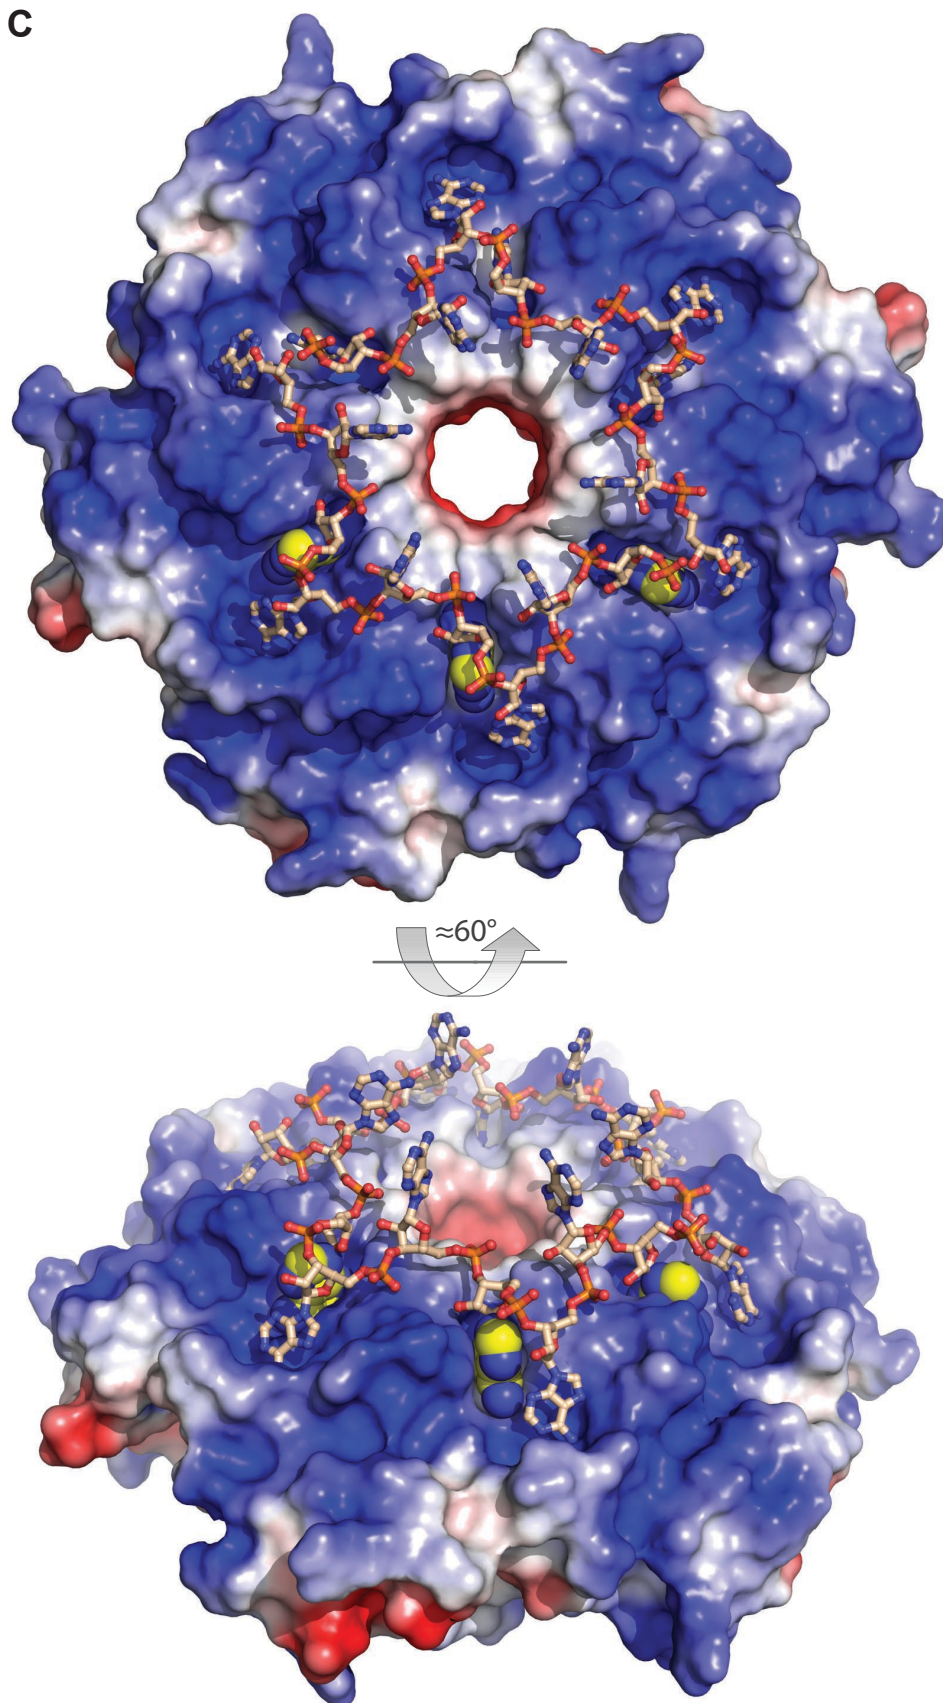



**Figure S4. Representations of volumetric data: Electron density and electrostatic potentials.** (*cont'd*)

**D**

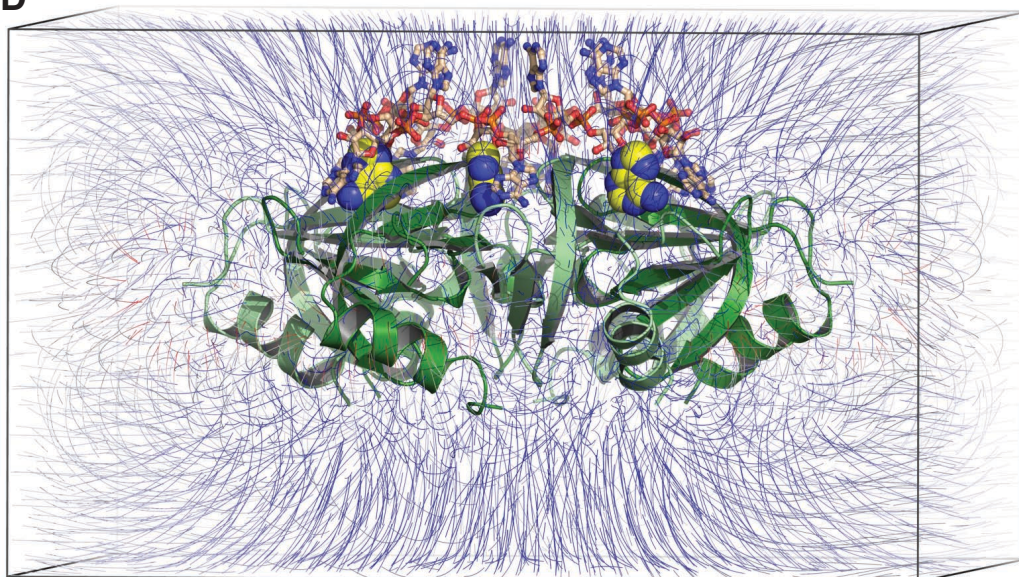

**E**

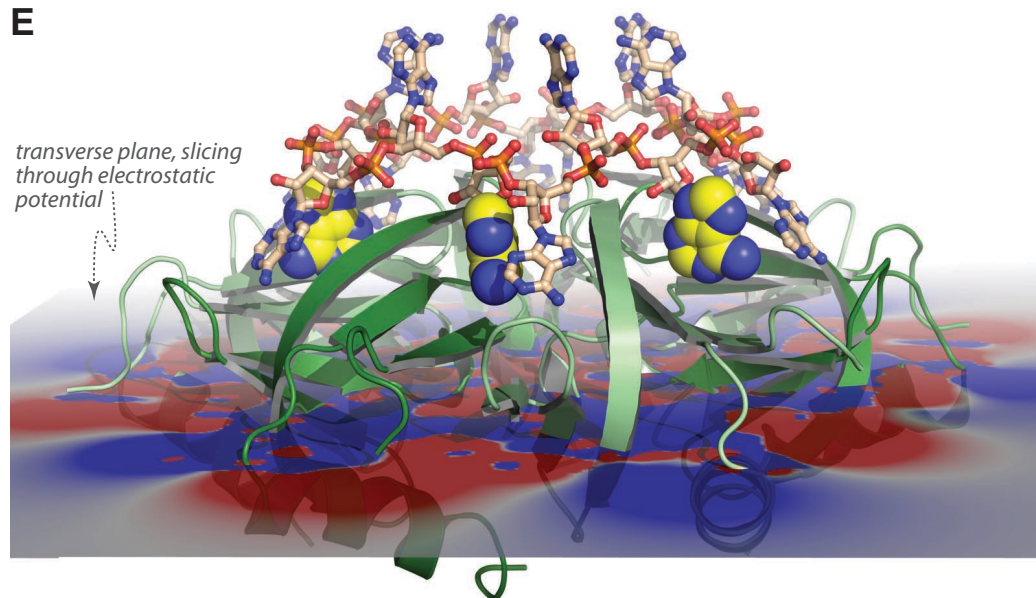

Supplement: S5 (10.1371/journal.pcbi.1000918.s005) [file journal.pcbi.1000918.s005]
